# Supplementary material for: Role of adhesion forces in mechanosensitive channel gating in Staphylococcus aureus adhering to surfaces
Source: PubMed Central journal article supplement (PMC7442641; doi:10.1038/s41522-020-00141-z), 2020-08-21
Supplement: 41522_2020_141_MOESM1_ESM.pdf [file 41522_2020_141_MOESM1_ESM.pdf]

## Supplementary Information

### Role of adhesion forces in mechanosensitive channel gating

#### in *Staphylococcus aureus* adhering to surfaces

Vera Carniello, Brandon W. Peterson\*, Henny C. van der Mei, Henk J. Busscher

University of Groningen and University Medical Center Groningen, Department of BioMedical Engineering, Groningen, Netherlands

\*Corresponding author:

Brandon W. Peterson

Department of Biomedical Engineering-FB40

University Medical Center Groningen

Antonius Deusinglaan 1

9713 AV Groningen

The Netherlands

Tel +31 50 3616110

[b.w.peterson@umcg.nl](mailto:b.w.peterson@umcg.nl)

## Supplementary Table 1

### Staphylococcal uptake of dihydrostreptomycin on different substratum surfaces

CFU reduction ( $\Delta\text{Log CFU mL}^{-1}$ ) as due to dihydrostreptomycin uptake on different substratum surfaces compared with PBS exposure.  $\pm$  signs represent standard deviations over three measurements from three different bacterial cultures for dihydrostreptomycin uptake. \* indicates significant differences from *S. aureus* RN4220 (One-way ANOVA, Sidak, \*\*  $p < 0.01$ ). t-values and degrees of freedom (df) of the One-way ANOVA with Sidak's multiple comparison correction (4 comparisons) are indicated in the last column.

|                              | <i>S. aureus</i><br>RN4220 | <i>S. aureus</i><br>RN4220 $\Delta\text{mscL}$ | t, df     |
|------------------------------|----------------------------|------------------------------------------------|-----------|
| <b>Polystyrene</b>           | $-2.1 \pm 0.3$             | $-0.8 \pm 0.6^{**}$                            | 3.525, 18 |
| <b>Gold</b>                  | $-2.3 \pm 0.6$             | $-1.2 \pm 0.4$                                 | 2.589, 18 |
| <b>Glass</b>                 | $-1.8 \pm 0.5$             | $-1.1 \pm 0.5$                                 | 1.792, 18 |
| <b>Pluronic-coated glass</b> | $-1.9 \pm 0.7$             | $-0.8 \pm -0.3$                                | 2.735, 18 |

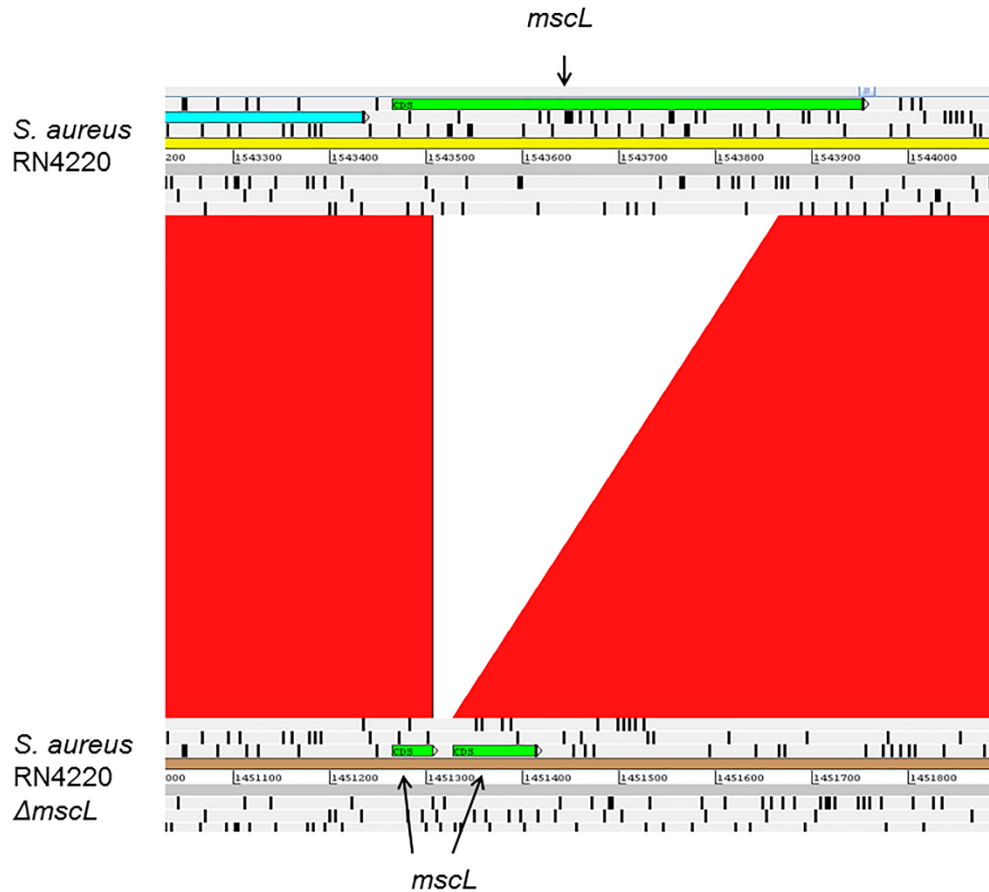

**Supplementary Figure 1. DNA sequencing of *mscL* genes in the parent *S. aureus* RN4220 strain and its isogenic  $\Delta mscL$  mutant.** Absence of *mscL* genes in the  $\Delta mscL$  mutant strain verified by DNA sequencing. Pair-wise comparison of *S. aureus* RN4220 (upper sequence) and *S. aureus* RN4220  $\Delta mscL$  (lower sequence). Red areas represent regions with BLASTN matches of 99.9% in the same orientations, visualized with Artemis Comparison Tool.<sup>1,2</sup>

## REFERENCES

1. Carver, T. J. *et al.* ACT: the Artemis comparison tool. *Bioinformatics* **21**, 3422-3423 (2005).

2. Desmet, S. *et al.* Antibiotic resistance plasmids cointegrated into a megaplasmid harboring the bla OXA-427 carbapenemase gene. *Antimicro. Agents Chemother.* **62**, e01448-17 (2018).
